# Supplementary material
Source: Springer Nature journal article supplement (http://www.springermedizin.de/resource/supplementary/12888_2012_1163_MOESM1_ESM.pdf/9479238)

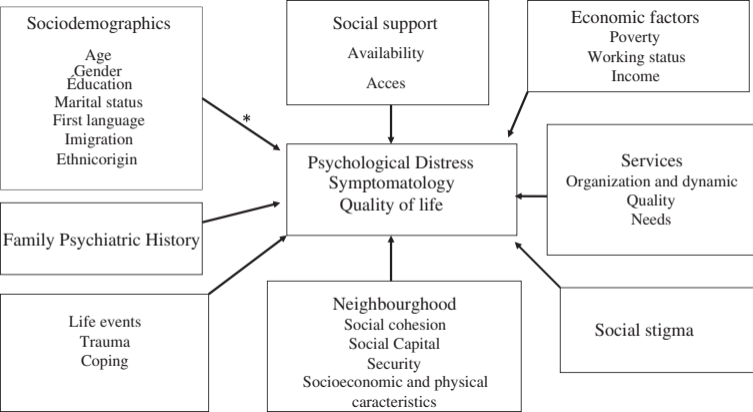

Supplement: MOESM1 [file 9479238]
